# Supplementary material for: Automation of human pluripotent stem cell differentiation toward retinal pigment epithelial cells for large-scale productions
Source: PubMed Central journal article supplement (PMC6650487; doi:10.1038/s41598-019-47123-6), 2019-07-23
Supplement: 41598_2019_47123_MOESM1_ESM.pdf [file 41598_2019_47123_MOESM1_ESM.pdf]

## **Automation of human pluripotent stem cell differentiation toward retinal pigment epithelial cells for large-scale productions**

Florian Regent<sup>1,2</sup>, Lise Morizur<sup>1,2,3</sup>, Léa Lesueur<sup>1,2,3</sup>, Walter Habeler<sup>1,2,3</sup>, Alexandra Plancheron<sup>1,2,3</sup>, Karim Ben M'barek<sup>1,2,3</sup>, Christelle Monville<sup>1,2\*</sup>

<sup>1</sup>INSERM U861, I-Stem, AFM, Institute for Stem cell Therapy and Exploration of Monogenic diseases, 91100 Corbeil-Essonnes, France;

<sup>2</sup>UEVE U861, I-Stem, AFM, Institute for Stem cell Therapy and Exploration of Monogenic diseases, 91100 Corbeil-Essonnes, France;

<sup>3</sup>CECS, I-Stem, AFM, Institute for Stem cell Therapy and Exploration of Monogenic diseases, 91100 Corbeil-Essonnes, France;

\*cmonville@istem.fr

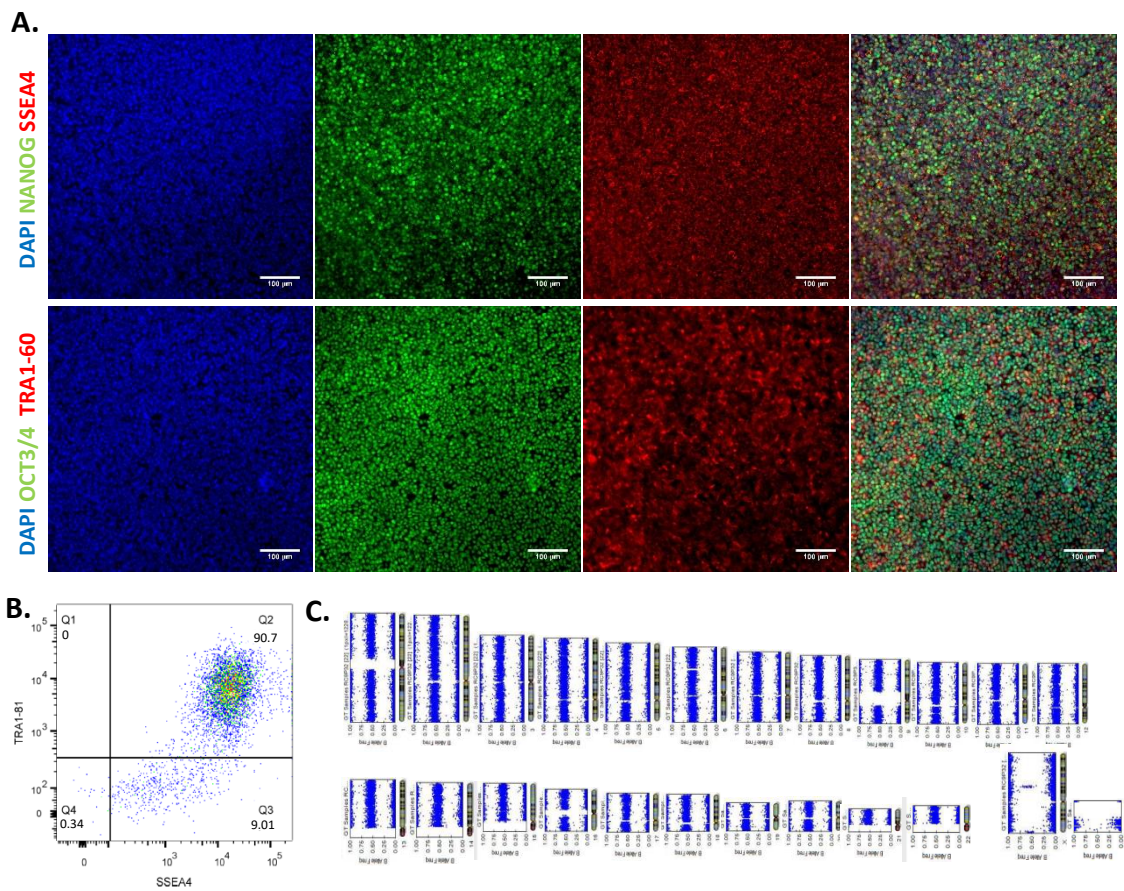

**Figure S1 : Characterization of the clinical-grade hESC line RC-09.** (A) Fluorescence images for the pluripotent markers NANOG, SSEA4, OCT3/4 and TRA1-60. Nuclei are stained with DAPI. (B) Representative flow cytometry histogram for the pluripotency markers TRA1-81 and SSEA4. (C) Analysis of copy number chromosome using high-density single-nucleotide polymorphism-based genotype arrays.

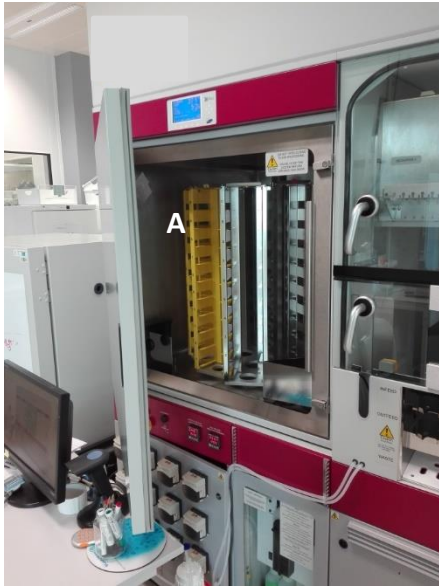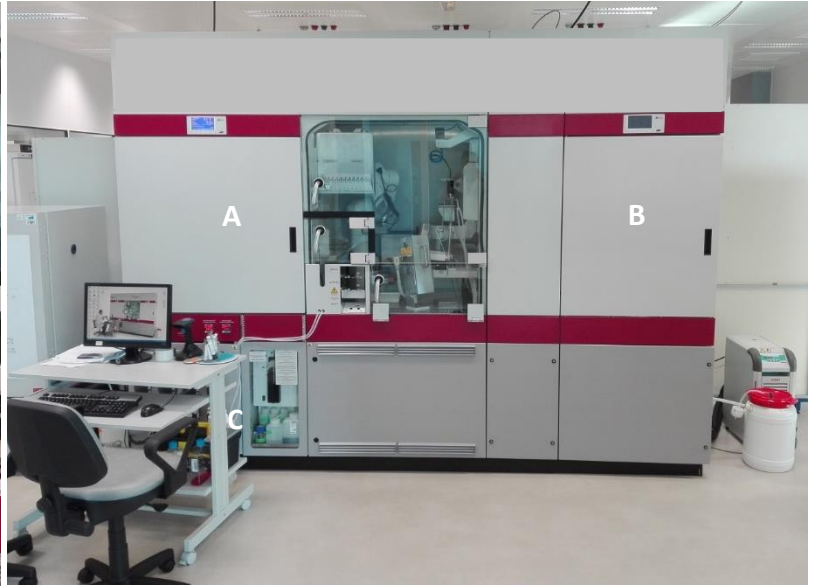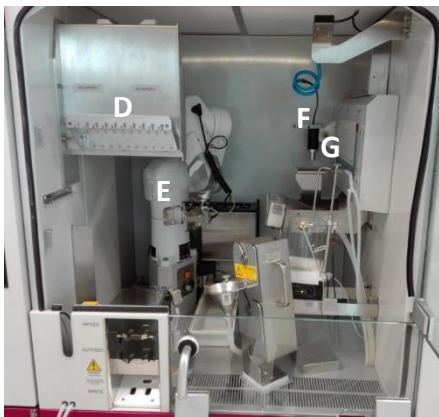

**Figure S2 : Overview of the Compact SelecT platform.** (A) Flask carousel incubator, (B) Plate incubator, (C) Media pumps, (D) Decappers, (E) Robot arm, (F) Pipette head and (G) IncuCyte live-cell analysis System .

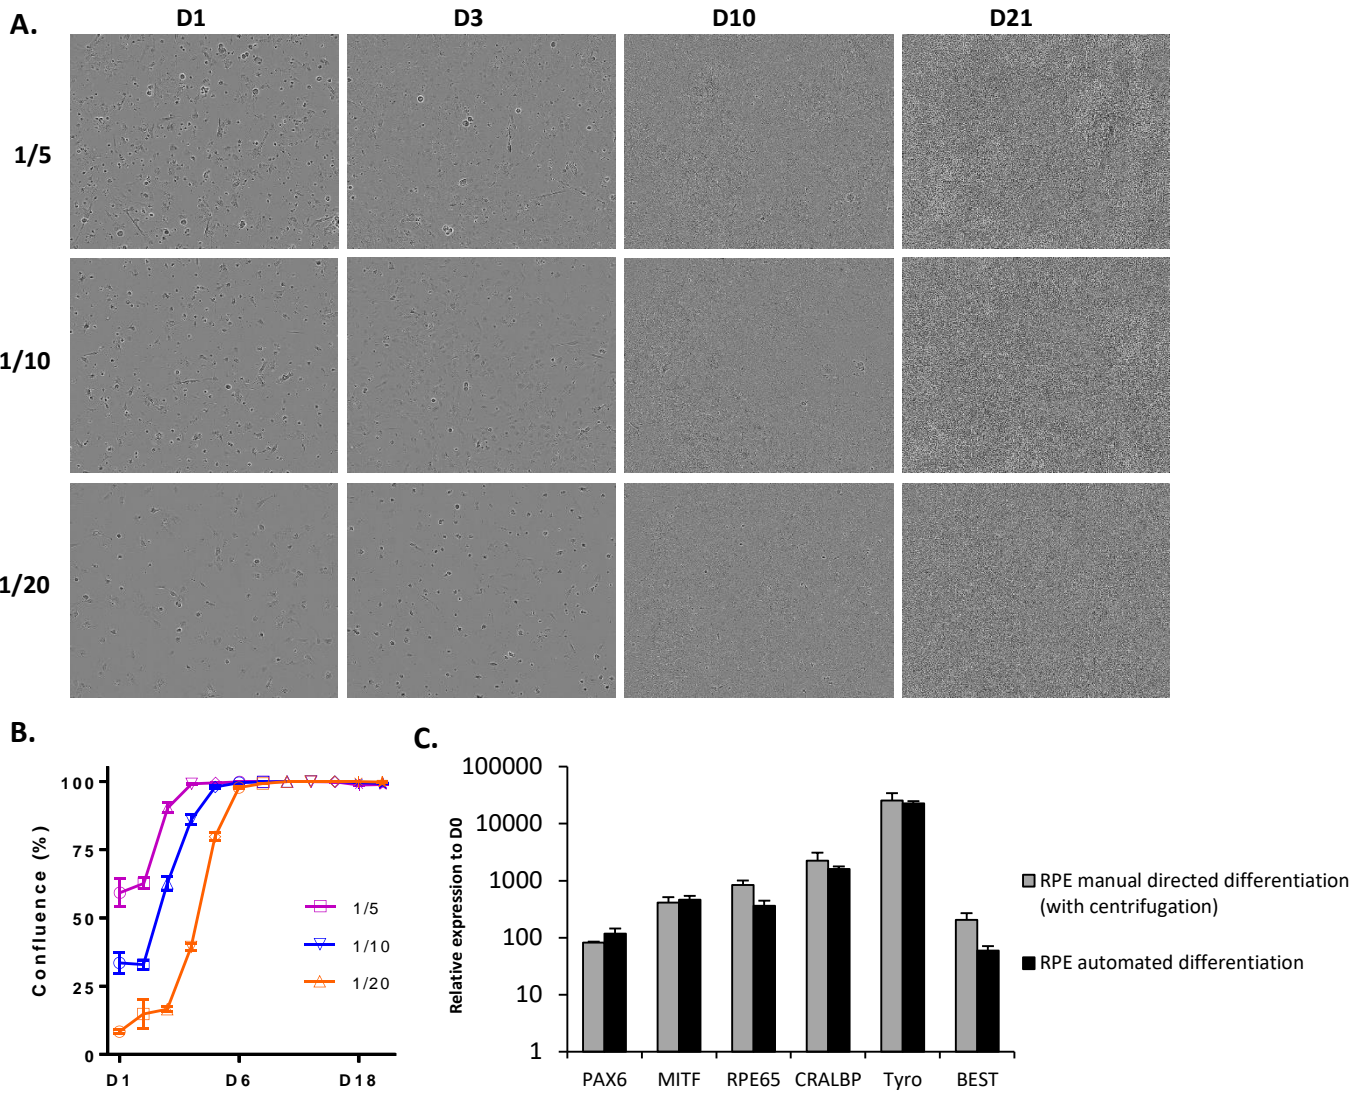

**Figure S3. Automated passaging of hESC-RPE cells with the absence of a centrifugation step to remove the dissociation reagent does not affect their identity.** Light microscopy images (A) and quantification of the cell confluence (B) of hESC-RPE cells split by 5, 10 or 20 after 42 days of differentiation without centrifugation after dissociation using the Compact SelecT platform. (C) Relative gene expression of RPE markers quantified by RT-qPCR (n = 3, mean  $\pm$  SD).

A

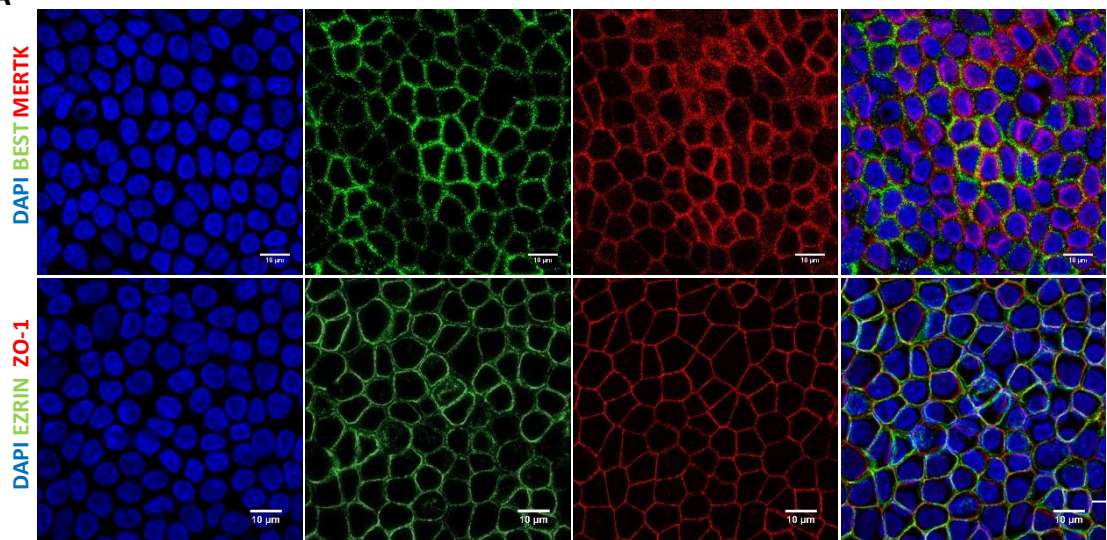

**Figure S4 : Characterization of hESC-RPE cells.** (A) Fluorescence images for the RPE markers BEST, MERTK, EZRIN and ZO-1 at passage 2 day 35. Nuclei are stained with DAPI.

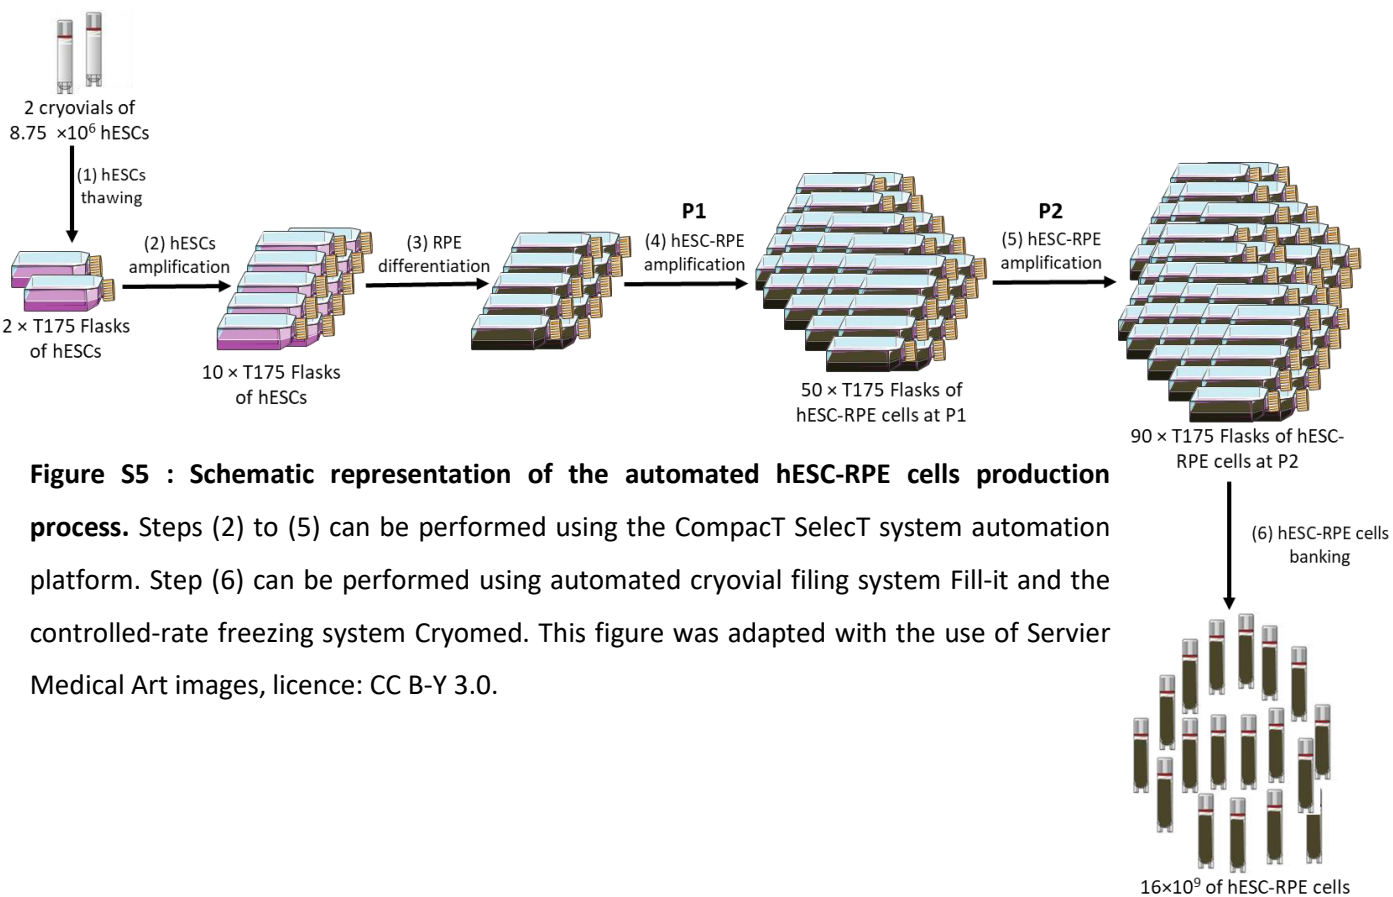

**Figure S5 : Schematic representation of the automated hESC-RPE cells production process.** Steps (2) to (5) can be performed using the Compact SelecT system automation platform. Step (6) can be performed using automated cryovial filing system Fill-it and the controlled-rate freezing system Cryomed. This figure was adapted with the use of Servier Medical Art images, licence: CC B-Y 3.0.

| Gene       |     | SEQUENCE                 |
|------------|-----|--------------------------|
| 18S        | FRW | GAGGATGAGGTGGAACGTGT     |
|            | REV | TCTTCAGTCGCTCCAGGTCT     |
| NANOG      | FRW | CAAAGGCAAACAACCCACTT     |
|            | REV | TCTGCTGGAGGCTGAGGTAT     |
| RAX        | FRW | GGCAAGGTCAACCTACCAGAG    |
|            | REV | CATGGAGGACACTTCCAGCTT    |
| SIX3       | FRW | CCTCCCACTTCTTGTTGCCA     |
|            | REV | CGCTACTCGCCAGAAGTATGG    |
| PAX6       | FRW | GCCAGCAACACACCTAGTCA     |
|            | REV | TGTGAGGGCTGTGTCTGTTT     |
| VSX2       | FRW | CTGCCGGAAGACAGGATACA     |
|            | REV | TAGAGCCCATACTCCGCCA      |
| MITF       | FRW | CCGGGTGCAGAATTGTAAC      |
|            | REV | GGACAATTTTGGCATTITGG     |
| RPE65      | FRW | AGCACTGAGTTGAGCAAGCA     |
|            | REV | GGCCTGTCTCACAGAGGAAG     |
| CRALBP     | FRW | CACGCTGCCCAAGTATGATG     |
|            | REV | CCAGGACAGTTGAGGAGAGG     |
| TYROSYNASE | FRW | GTGTAGCCTTCTTCCAACCTCAG  |
|            | REV | GTTCTCATTACCAAATAGCATCC  |
| BEST1      | FRW | GTCAGAGGCTCCTCCTTCT      |
|            | REV | TCTGCTCCACCAGTGTCTG      |
| LUM        | FRW | CTTCAATCAGATAGCCAGACTGC  |
|            | REV | AGCCAGTTCGTTGTGAGATAAAC  |
| FN1        | FRW | GGAAAGTGCCCTATCTCTGATACC |
|            | REV | AATGTTGGTGAATCGCAGGT     |

**Table S1 : List of quantitative reverse transcriptase polymerase chain reaction (qRT-PCR) primers.**

| Antibody | Host   | Company                  | Reference  | Dilution      | Application        |
|----------|--------|--------------------------|------------|---------------|--------------------|
| PAX6     | Rabbit | Biologend                | PRB-278P   | 1/500         | Immunofluorescence |
| MITF     | Mouse  | Dako                     | M3621      | 1/250         | Immunofluorescence |
| VSX2     | Goat   | Santa Cruz Biotechnology | sc-21690   | 1/250         | Immunofluorescence |
| TYRP1    | Mouse  | LifeSpan BioSciences     | MS-771-P1  | 1/500 - 1/100 | Flow cytometry     |
| EZRIN    | Mouse  | Sigma                    | E8897      | 1/250         | Immunofluorescence |
| ZO-1     | Rabbit | Invitrogen               | 402300     | 1/500         | Immunofluorescence |
| BEST     | Mouse  | Abcam                    | ab2182     | 1/250         | Immunofluorescence |
| MERTK    | Rabbit | Abcam                    | Y323       | 1/500         | Immunofluorescence |
| NANOG    | Rabbit | Abcam                    | ab80892    | 1/500         | Immunofluorescence |
| OCT 3/4  | Goat   | Santa Cruz Biotechnology | sc-5279    | 1/500         | Immunofluorescence |
| SSEA4    | Mouse  | R&D systems              | FAB1435A   | 1/100         | Flow cytometry     |
| TRA1-60  | Mouse  | Santa Cruz Biotechnology | sc-21705   | 1/500         | Immunofluorescence |
| TRA1-81  | Mouse  | Santa Cruz Biotechnology | sc-21706   | 1/500         | Immunofluorescence |
| TRA1-81  | Mouse  | eBioscience              | 12-8883-82 | 1/100         | Flow cytometry     |

**Table S2 : List of primary antibodies.**
